# Supplementary material for: Should the WHO Growth Charts Be Used in France?
Source: PubMed Central journal article supplement (PMC4356547; doi:10.1371/journal.pone.0120806), 2015-03-11
Supplement: pone.0120806.s005.pdf [file pone.0120806.s005.pdf]

**S1 Table.** Percentage of children classified as stunted according to both growth charts.

| <b>Age<br/>(year)</b> | <b>n</b> | <b>FR<br/>(&lt; 3<sup>th</sup>)</b> | <b>WHO<br/>(&lt; 2SD<sup>†</sup>)</b> |
|-----------------------|----------|-------------------------------------|---------------------------------------|
| <b>GIRLS</b>          |          |                                     |                                       |
| 0 to <0.5             | 2262     | 3.6                                 | 5.2                                   |
| 0.5 to <1             | 2106     | 0.9                                 | 2.1                                   |
| 1 to <2               | 1668     | 1.3                                 | 3.2                                   |
| 2 to <3               | 1454     | 0.6                                 | 1.0                                   |
| 3 to <5               | 1031     | 0.7                                 | 1.7                                   |
| 5 to <8               | 3342     | 1.0                                 | 1.8                                   |
| 8 to <11              | 5375     | 1.2                                 | 1.7                                   |
| 11 to <14             | 1283     | 1.6                                 | 1.8                                   |
| 14 to <18             | 2060     | 2.3                                 | 0.9                                   |
| <b>BOYS</b>           |          |                                     |                                       |
| 0 to <0.5             | 2507     | 2.2                                 | 5.5                                   |
| 0.5 to <1             | 2298     | 1.3                                 | 3.4                                   |
| 1 to <2               | 1773     | 0.7                                 | 3.0                                   |
| 2 to <3               | 1599     | 0.5                                 | 1.4                                   |
| 3 to <5               | 1123     | 0.3                                 | 1.3                                   |
| 5 to <8               | 3531     | 0.7                                 | 1.3                                   |
| 8 to <11              | 5397     | 1.0                                 | 1.1                                   |
| 11 to <14             | 1282     | 0.9                                 | 1.9                                   |
| 14 to <18             | 1830     | 1.7                                 | 1.3                                   |

SD: Standard Deviation;

† WHO < 2 SD correspond to WHO < 2.3<sup>th</sup>
